# Supplementary material for: Webcrawling and machine learning as a new approach for the spatial distribution of atmospheric emissions
Source: PLOS journal article supplement (doi:10.1371/journal.pone.0200650), 2018-07-16

# Data availability as the key

- Dwelling number and type (g); 2.4 MM dwelling + cabins (SSB);
- Energy consumption statistics (k); total and per energy sector; type of dwelling; 660k dwelling (ENOVA);
- Fireplace / stoves locations (p/k); location of fireplace/stoves; model/type technology (Rentbrennende); >1000k locations / 101 municipalities (Fire Departments)
- **Webcrawling database (p)**; type of dwelling; heating source; >400k dwelling (*finn.no*);

## Webcrawling data

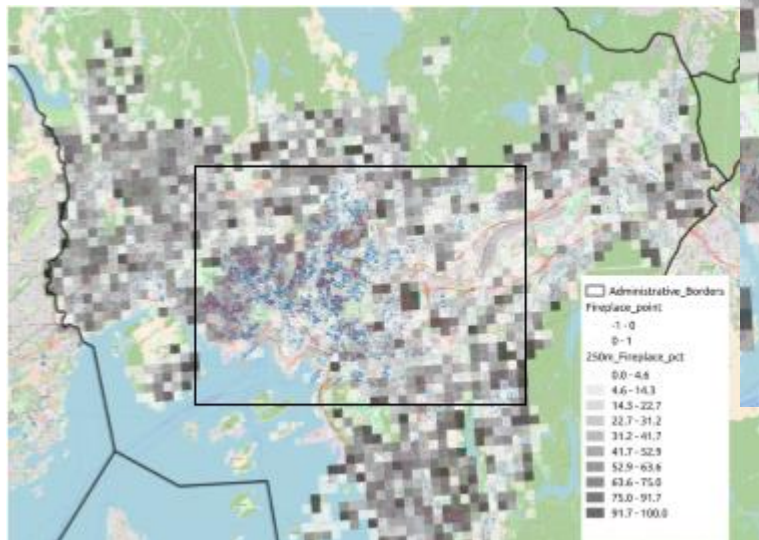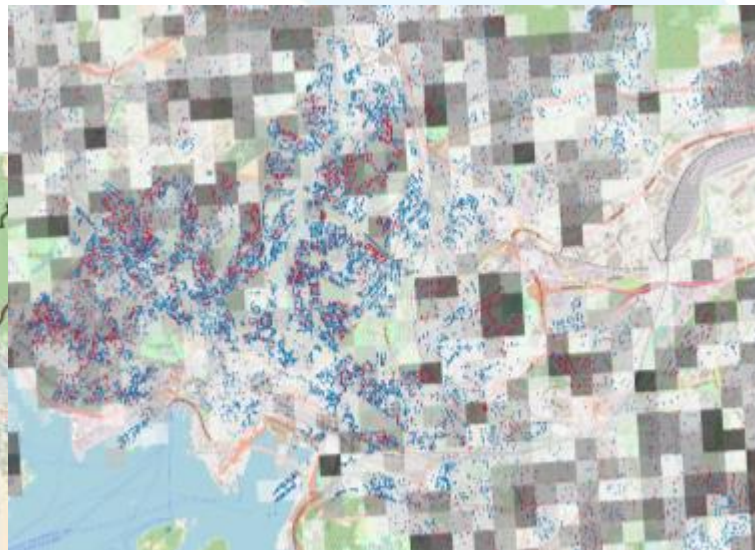

Supplement: S2 (10.1371/journal.pone.0200650.s002) [file journal.pone.0200650.s002]
